# Supplementary material for: From Phenology and Habitat Preferences to Climate Change: Importance of Citizen Science in Studying Insect Ecology in the Continental Scale with American Red Flat Bark Beetle, Cucujus clavipes, as a Model Species
Source: MDPI journal article supplement (doi:10.3390/insects12040369), 2021-04-20
Supplement: s1 [file s1]

**Data S1.** Records of *C. c. clavipes* and *C. c. puniceus* accepted for this study from the iNaturalist.org database shown according to the scheme: latitude/longitude/(day.month.year). Records marked with asterisk (\*) were accepted for the ENM analysis.

***Cucujus clavipes clavipes*:**

**CANADA:** *Manitoba*: \*49.837759/-97.079408 (14.04.2015); 50.241601/-97.30696 (22.04.2016); 49.422937/-96.275963 (29.04.2018); 49.873046/-97.105548 (14.04.2019); \*49.92032/-99.612687 (30.04.2020); 50.552116/-99.771591 (07.04.2020); 50.08747/-96.859134 (21.05.2020); *New Brunswick*: \*46.390469/-64.620765 (10.05.2018); 46.052077/-64.929756 (14.10.2019); \*45.995173/-67.238639 (15.05.2020); \*45.72185/-65.498251 (03.05.2020); 45.960541/-66.64727 (27.08.2020); *Nova Scotia*: \*45.010064/-63.571225 (25.04.2018); \*45.95113/-61.169097 (19.05.2019); *Ontario*: \*45.361712/-79.282612 (27.03.2007); 44.590922/-79.539184 (06.04.2012); \*42.078799/-82.4928 (13.04.2014); \*42.982784/-81.283909 (12.04.2015); \*43.743961/-79.801733 (16.04.2016); 43.538983/-80.215618 (09.04.2017); 42.29887/-81.842491 (24.10.2017); \*45.513108/-80.319687 (27.10.2017); 43.39558/-80.4739 (30.04.2018); \*45.385296/-75.22712 (21.04.2018); 45.209885/-75.226715 (23.04.2018); 45.183483/-76.124261 (27.09.2018); 41.963064/-82.518997 (27.04.2018); \*45.247927/-77.994747 (22.12.2018); 44.902939/-76.095801 (27.04.2018); 43.86914/-79.310987 (26.04.2018); 44.722866/-78.26313 (18.09.2019); 44.054967/-80.262297 (22.10.2019); 43.528196/-80.227672 (02.04.2019); 42.948984/-81.429989 (18.06.2019); 43.535987/-80.247819 (15.04.2019); 43.882929/-79.025355 (20.03.2019); 44.507813/-76.55098 (18.03.2019); 43.954519/-79.081029 (21.09.2019); 44.026753/-79.535996 (21.09.2019); 42.985944/-81.253332 (08.10.2019); 42.270889/-81.854967 (19.07.2019); 45.383568/-79.277397 (12.10.2019); 43.576561/-79.999206 (16.05.2020); 45.220432/-75.721315 (12.03.2020); 43.041381/-81.277843 (04.04.2020); 45.274263/-79.284058 (17.05.2020); 43.694404/-80.249126 (06.03.2020); 44.042914/-80.292243 (09.03.2020); 43.696847/-80.245129 (20.03.2020); \*45.098956/-81.404255 (12.04.2020); 43.694519/-80.249175 (06.03.2020); 43.69686/-80.245402 (27.03.2020); 42.670939/-80.404099 (08.04.2020); 43.769979/-79.147862 (11.04.2020); 43.867358/-80.763091 (03.05.2020); 42.96365/-81.153571 (27.05.2020); 45.199712/-79.002442 (03.02.2020); 45.356236/-75.677017 (07.06.2020); 42.897259/-78.949552 (12.05.2020); 44.559937/-79.439562 (24.05.2020); 43.477867/-80.770845 (16.05.2020); \*46.663597/-84.259767 (06.05.2020); 45.349924/-75.823613 (17.05.2020); \*43.967787/-78.676889 (17.03.2020); 44.71798/-78.997725 (02.04.2020); 43.827297/-79.410697 (26.05.2020); 43.033677/-81.231837 (03.05.2020); 42.092625/-82.442372 (24.05.2020); 43.812048/-79.15372 (16.06.2020); 44.586376/-79.51429 (13.05.2020); 42.263861/-83.074863 (23.03.2020); 42.26292/-83.079179 (20.03.2020); 43.185465/-80.657084 (03.05.2020); *Quebec*: \*48.414036/-71.037335 (10.06.1986); \*45.418156/-72.681962 (06.06.2008); \*46.8361/-71.340974 (03.05.2013); 46.793919/-71.30717 (10.09.2017); 46.927472/-71.194595 (06.05.2017); 46.966537/-71.303596 (13.05.2017); 46.792101/-71.327213 (27.08.2017); \*45.967045/-74.159461 (09.05.2018); \*48.31783/-69.422046 (10.10.2019); 45.363342/-72.202098 (29.09.2019); 46.775329/-71.287033 (13.10.2019); 45.463641/-74.270821 (29.10.2019); 48.400019/-71.039766 (06.09.2019); 46.809792/-71.295425 (12.09.2019); 46.838392/-71.247569 (27.06.2020); 45.58007/-74.383804 (29.05.2020); 46.810574/-71.315289 (11.05.2020); 45.463641/-74.270821 (03.04.2020); 46.806267/-71.306075 (15.05.2020);

**USA:** *Alabama*: \*34.726026/-86.641047 (07.11.2017); 34.725994/-86.641241 (07.11.2017); \*33.180937/-87.024261 (30.11.2019); *Arkansas*: \*35.687298/-90.39914 (23.02.2020); *Connecticut*: 41.677455/-73.291488 (04.11.2019); \*41.373005/-72.572137 (27.03.2020); 41.725463/-73.209599 (28.04.2016); *Delaware*: 39.787892/-75.619263 (08.04.2019); *District of Columbia*: \*38.970879/-77.043578 (06.04.2019); 38.974474/-77.046453 (30.03.2019); 38.975997/-77.043454 (06.07.2019); 38.970612/-77.044115 (16.04.2017); 38.97093/-77.043475 (27.06.2020); 38.937496/-77.067305 (06.06.2020); 38.973322/-77.047269 (19.07.2014); 38.973322/-77.047269 (12.03.2016); 38.973806/-77.047934 (10.09.2016); 38.977368/-77.044233 (07.09.2017); 38.973064/-77.046432 (07.09.2014); 38.974665/-77.039372 (09.10.2016); 38.97/-77.04 (28.07.2018); 38.986357/-77.049861 (22.06.2019); 38.97945/-77.043593 (08.06.2019); 38.970834/-77.043046 (28.04.2019); 38.977515/-77.041104 (28.09.2018); *Illinois*: \*41.994045/-87.765213 (01.03.2020); 41.213688/-88.025917 (26.04.2019); 41.21369/-88.026056 (24.04.2019); 41.212788/-88.013835 (26.04.2019); \*42.298923/-90.10312 (15.06.2018); 42.1114/-88.292512 (06.04.2019); 41.638233/-87.975137 (08.04.2019); \*37.484444/-89.350441 (13.04.2018); 42.428842/-87.931395 (20.04.2014); 41.680038/-87.863 (21.02.2017); *Indiana*: \*39.230371/-87.045844 (14.02.2020, 21.02.2020); \*39.949812/-85.872162 (12.04.2020); 39.108567/-86.582414 (06.04.2020); *Kansas*: \*38.978655/-95.239913 (14.09.2019); 38.409415/-94.660177 (20.03.2017); *Kentucky*: \*36.699034/-84.472586 (29.03.2017); \*38.960138/-84.54815 (28.04.2020); \*37.946456/-83.796999 (10.03.2020); *Maine*: \*44.098075/-70.286614 (03.05.2020); \*43.600989/-70.234141 (15.05.2020); \*44.492947/-68.996871 (30.05.2018); 44.500895/-68.955724 (16.11.2019); \*43.211814/-70.67791 (16.11.2017); *Maryland*: 38.617278/-76.803434 (17.05.2020); 39.001403/-76.82225 (25.05.2020); \*38.80798/-76.140097 (29.04.2020); \*39.715831/-79.341157 (28.03.2020); 39.001403/-76.822272 (04.10.2019); 39.366277/-76.646792

(25.04.2019); 39.132786/-76.909286 (04.04.2019); 39.472828/-76.40162 (19.02.2017); 39.647376/-77.438017 (25.03.2017); 38.874108/-76.550347 (09.03.2017); 39.60553/-76.138853 (15.05.2016); **Massachusetts:** \*42.288197/-71.749725 (10.03.2020); \*42.058688/-72.686059 (14.04.2019); 42.099162/-72.711271 (05.10.2019); \*41.985802/-70.957245 (04.05.2018); 42.407852/-71.471493 (26.03.2006); **Michigan:** 42.359546/-82.93111 (08.04.2020); \*43.029548/-83.604576 (08.04.2020); 42.709817/-84.335687 (16.05.2020); \*44.80399/-83.582214 (04.05.2020); \*42.882878/-85.705537 (28.04.2020); \*43.785199/-86.433782 (02.05.2020); 42.80747/-84.368722 (20.04.2020); 42.798027/-84.900439 (07.04.2020); 42.94931/-85.549923 (15.11.2019); \*45.192132/-85.118897 (09.10.2019); 42.810445/-85.733526 (02.05.2018); 42.63794/-85.296096 (08.04.2019); 44.883467/-85.001893 (01.04.2019); 42.924059/-83.670905 (29.04.2009); 42.406641/-85.38224 (23.05.2018); 43.094655/-84.160974 (30.04.2018); \*46.564782/-86.15302 (09.05.2017); \*41.95332/-86.045083 (04.05.2009); 42.27203/-83.767167 (13.08.2008); 42.801697/-84.443771 (22.04.2018); 44.61067/-85.519016 (12.06.2017); **Minnesota:** \*44.467647/-93.181604 (18.11.2017); \*46.799346/-96.121101 (11.04.2015); 43.955594/-92.439576 (30.05.2020); \*46.815507/-92.10008 (10.06.2020); 44.8217/-93.120072 (24.05.2020); 46.770878/-92.198572 (23.05.2020); 44.923994/-92.95938 (20.05.2020); 47.124059/-92.677125 (30.04.2020); 44.970176/-93.234941 (01.05.2020); 44.91544/-93.128012 (27.04.2020); 44.972033/-93.387624 (07.04.2020); 45.198193/-93.22973 (27.03.2020); 43.974687/-93.917817 (20.03.2006); 45.092758/-92.87999 (19.10.2019); 44.637922/-93.409627 (29.10.2019); \*46.212361/-93.07313 (07.09.2019); 45.301812/-93.607752 (16.04.2019); 44.397792/-92.101148 (22.10.2018); \*47.382497/-91.193567 (18.10.2018); 44.936375/-93.194183 (14.09.2018); 46.923924/-96.746818 (13.05.2018); 44.897903/-93.363361 (16.04.2017); 44.467455/-93.17993 (12.04.2016); 44.898315/-93.362955 (27.11.2015); 44.4677/-93.18037 (07.03.2016); 44.46303/-93.171089 (30.03.2013); **Missouri:** 39.283803/-94.491897 (11.07.2020); \*39.373537/-90.905908 (14.10.2017); **Nebraska:** \*42.205987/-97.237774 (22.06.2020); **New Hampshire:** \*43.22881/-71.421562 (19.04.2020); \*43.643112/-72.173662 (22.05.2020); 43.286182/-71.460025 (03.05.2020); 44.086811/-71.919991 (20.10.2019); **New Jersey:** 39.892764/-75.138551 (14.05.2020); 39.892764/-75.138551 (14.05.2020); 40.744869/-74.552316 (23.04.2015); \*40.364539/-74.928361 (17.04.2016); 41.186414/-74.798443 (11.04.2015); 40.744796/-74.550501 (23.04.2015); **New York:** \*41.006673/-73.865337 (05.04.2020); \*43.042275/-73.782197 (04.04.2020); 43.054061/-78.873383 (29.03.2020); \*42.087051/-73.9437 (12.04.2020); \*42.88867/-77.519937 (25.05.2020); \*42.434439/-76.486392 (11.04.2020); 42.700725/-78.803905 (26.04.2020); 42.936733/-76.54132 (28.04.2020); 42.444141/-76.755413 (28.04.2020); 41.843918/-75.055129 (02.05.2020); 41.932887/-74.154432 (03.05.2020); 42.447848/-76.808455 (03.05.2020); 43.254866/-75.996267 (12.05.2020); 41.690188/-74.372528 (24.05.2020); 43.267184/-76.43317 (12.05.2020); \*40.962598/-73.109007 (14.03.2020); \*44.568706/-73.776379 (20.03.2020); 43.028295/-76.133355 (09.03.2020); 42.452415/-76.516609 (20.03.2020); 42.367429/-79.215067 (28.06.2014); 44.852011/-74.278325 (01.06.2019); 42.443508/-76.758202 (06.05.2019); 43.194336/-76.541303 (25.05.2019); 41.183788/-73.678856 (30.03.2019); 43.577112/-73.65455 (09.05.2019); 42.844988/-78.850997 (07.04.2019); 42.453514/-76.477386 (13.04.2019); 42.457401/-73.488758 (18.04.2018); 43.032476/-77.062357 (27.04.2018); 42.063244/-76.161 (27.04.2018); \*44.206539/-75.250983 (01.05.2018); 41.690017/-73.898296 (03.05.2018); 42.435733/-79.123783 (25.03.2018); 25.03.2018./-78.646787 (01.03.2018); 41.683938/-73.896517 (18.10.2017); 41.690188/-74.372528 (20.05.2020); 42.866195/-75.661863 (20.04.2017); 43.450048/-76.302342 (27.11.2015); **North Carolina:** \*35.204971/-82.565192 (12.05.2020); 35.706774/-82.58289 (11.03.2020); **Ohio:** 41.310677/-81.875603 (24.05.2020); 41.186375/-81.742705 (17.05.2020); 40.786489/-81.827175 (12.04.2020); 41.449705/-81.273907 (23.05.2020); \*39.87648/-83.31669 (04.04.2020); 41.250162/-81.572234 (03.04.2020); 40.515951/-82.785623 (04.04.2020); 41.704669/-80.988903 (07.04.2020); 41.184163/-81.794976 (07.04.2020); \*41.641518/-84.364699 (08.04.2020); 41.228744/-81.512017 (03.04.2020); 41.263398/-81.282086 (04.04.2020); 39.169225/-84.103392 (08.03.2020); 41.581864/-81.29516 (08.03.2020); 40.620258/-82.323718 (03.04.2020); 40.992938/-81.679467 (16.04.2019); 40.151971/-83.029063 (16.03.2015); 41.27374/-81.639709 (16.04.2016); \*39.33489/-82.130518 (29.10.2019); 40.057683/-83.794822 (28.07.2019); 41.415288/-81.260334 (19.06.2019); 39.591149/-82.28314 (09.02.2019); 41.33613/-81.457397 (07.04.2019); 41.553372/-83.670533 (07.04.2019); 41.575387/-81.264575 (13.04.2019); 41.65355/-81.203383 (01.05.2018); \*41.27961/-80.721283 (07.09.2017); 39.640331/-84.455616 (01.05.2018); 41.154194/-81.831566 (12.04.2018); 41.113664/-82.296481 (22.04.2018); 41.333718/-81.657974 (25.03.2017); 39.342247/-84.475325 (12.04.2015); **Pennsylvania:** 40.650897/-80.176347 (03.05.2020); 39.780123/-76.288228 (09.05.2020); 40.368237/-80.052353 (11.06.2020); \*40.423339/-77.685079 (08.04.2020); 40.528912/-80.213967 (25.04.2020); 40.816131/-77.984897 (05.04.2020); 40.013945/-76.353944 (04.03.2020); 40.536295/-79.872112 (14.11.2019); 40.036921/-75.202412 (26.04.2019); 40.815796/-77.985023 (23.05.2019); \*40.650235/-79.508615 (08.05.2019); 41.948588/-80.350838 (07.04.2019); 40.732239/-80.247341 (12.04.2018); \*41.123322/-76.566353 (04.11.2015); 39.908389/-75.357343 (14.04.2017); 40.253286/-75.476681

(09.05.2016); 39.992643/-77.121209 (17.09.2016); **South Dakota**: \*43.529322/-96.691471 (07.04.2019); **Tennessee**: \*35.745556/-87.209722 (19.03.2020); \*35.789203/-85.007747 (03.03.2020); \*35.739067/-83.423739 (19.06.2020); \*36.590613/-82.292464 (14.12.2018); 35.04563/-85.30968 (14.01.2017); 34.999364/-85.184775 (09.01.2016); **Vermont**: 44.32915/-73.107492 (01.05.2020); 44.792574/-72.129356 (18.05.2020); 43.782058/-72.357101 (03.05.2020); 44.17826/-73.370764 (04.05.2020); 42.855488/-72.57225 (03.05.2020); 44.658038/-72.678497 (25.04.2020); 44.152275/-72.784242 (19.04.2020); 44.417621/-73.104517 (04.04.2020); 43.831136/-72.63689 (21.03.2020); 44.397317/-72.719125 (20.09.2019); 44.107016/-72.861197 (05.11.2019); 44.391109/-72.966705 (17.05.2019); 43.49038/-72.422375 (13.04.2019); 44.201603/-73.047844 (29.05.2018); 44.580387/-73.198022 (01.06.2017); 43.492743/-72.802447 (07.10.2018); 44.346988/-72.990508 (24.04.2018); 43.59333/-72.452515 (12.05.2016); 44.763536/-72.147131 (11.11.2013); 43.853296/-72.589057 (18.05.2013); **Virginia**: 38.914532/-77.316994 (11.11.2019); 39.05732/-77.330231 (06.11.2019); 38.907895/-77.114747 (26.04.2020); 38.963904/-77.330996 (13.05.2020); 38.871104/-77.140412 (02.05.2020); 38.871329/-77.141023 (02.05.2020); 38.95726/-77.331575 (11.03.2020); 38.964416/-77.331134 (29.02.2020); 38.960968/-77.313889 (24.02.2020); 38.96447/-77.260842 (20.03.2020); 39.036892/-77.306915 (16.02.2020); 39.009853/-77.311951 (15.02.2020); 38.691218/-77.498949 (24.10.2019); 38.966236/-77.302109 (07.01.2020); 38.957558/-77.312714 (07.02.2020); 38.363955/-77.592987 (03.02.2020); 38.766578/-77.315899 (28.12.2019); 39.040634/-77.310844 (30.09.2019); 38.97724/-77.357078 (30.12.2018); 38.931831/-77.323799 (11.03.2019); 38.932598/-77.321487 (02.12.2018); 38.914772/-77.318802 (05.12.2018); 38.961778/-77.37725 (25.01.2019); 38.371407/-77.332551 (28.02.2016); \*39.022483/-78.018816 (08.03.2016); \*36.811913/-80.354809 (18.09.2015); \*37.608756/-77.373314 (30.11.2014); **West Virginia**: \*38.628336/-79.712122 (06.06.2020); 39.248527/-80.380513 (03.05.2020); 39.4173/-79.118767 (26.03.2020); **Wisconsin**: \*45.487583/-91.619604 (26.04.2020); \*43.906778/-88.666971 (08.04.2020); \*43.289725/-89.600905 (03.04.2020); 44.522011/-87.993927 (08.04.2017); 44.506429/-87.945322 (09.05.2020).

***Cucujus clavipes puniceus*:**

**CANADA**: **Alberta**: \*56.737927/-118.279807 (14.05.2009); \*56.770201/-111.460096 (22.04.2019); \*55.509515/-114.928995 (09.05.2019); \*53.550176/-116.768726 (27.03.2020); 56.1425/-117.733611 (28.03.2020); \*53.682409/-112.824863 (18.06.2020); **British Columbia**: \*52.431232/-131.373962 (13.06.2009); \*49.235814/-123.197508 (13.05.2014); \*54.392191/-126.66039 (28.04.2016); \*50.11187/-117.898648 (10.05.2017); \*56.228209/-120.803791 (27.04.2018); \*50.829727/-118.9747 (01.05.2018); 54.392278/-126.66043 (15.05.2018); 49.282562/-122.772483 (09.10.2018); \*49.315388/-122.440522 (19.05.2018); 49.526561/-124.699014 (30.08.2019); \*49.589283/-125.533539 (09.06.2019); \*54.066723/-122.985928 (10.05.2019); \*48.926228/-123.455338 (04.05.2019); 49.314076/-122.748429 (09.05.2019); 49.248506/-123.219174 (12.05.2019); 50.660482/-119.164947 (26.05.2019); 49.594313/-125.530121 (09.06.2019); \*49.779522/-123.1167 (02.06.2019); \*52.505713/-121.226131 (09.05.2019); \*49.511311/-115.05632 (14.05.2019); \*52.337658/-125.769883 (18.06.2019); \*50.519985/-122.845314 (10.04.2020); 49.826163/-125.051864 (24.04.2020); \*48.464984/-123.319414 (06.04.2020); \*48.766623/-123.887618 (05.05.2020); 49.335833/-122.768333 (19.04.2020); 49.466956/-123.237139 (08.05.2020); 49.466954/-123.237015 (08.05.2020); 49.314723/-122.915475 (08.05.2020); 49.320563/-122.735607 (30.05.2020); 50.276047/-119.216238 (10.05.2020); \*54.519995/-128.539837 (04.05.2020); 49.440676/-123.437167 (10.05.2020); 50.516012/-122.720571 (08.05.2020); 53.51348/-123.275903 (20.06.2019); 49.552533/-117.52055 (04.07.2020); \*49.101971/-121.92378 (18.04.2020); \*49.917481/-116.916377 (09.05.2020); 49.518208/-123.213487 (19.07.2020); 50.558922/-122.277905 (21.07.2020); \*49.189308/-125.287835 (25.07.2020); 49.535095/-121.877822 (03.06.2020);

**USA**: **Alaska**: \*57.053583/-135.327256 (09.01.2013); \*60.458659/-151.082085 (29.12.2014); 57.054071/-135.326873 (28.05.2015); \*57.092324/-135.450436 (05.07.2015); \*58.29773/-134.384247 (10.06.2016); 60.714008/-151.366058 (22.05.2017); \*61.019093/-149.480074 (27.04.2018); 61.229973/-149.26973 (07.04.2018); 57.049998/-135.321586 (06.05.2018); 58.407403/-134.583953 (12.06.2018); 61.154438/-150.063278 (26.05.2018); 61.310188/-149.503045 (03.04.2019); 61.164055/-149.764984 (26.04.2019); 61.589683/-149.099883 (17.04.2019); 60.529235/-150.819481 (15.04.2019); \*56.36096/-132.3557 (27.04.2019); 60.701212/-151.321547 (25.05.2020); \*60.544029/-145.75798 (05.06.2020, 15.06.2020); \*64.904448/-147.782007 (29.04.2020, 02.05.2020); \*58.131383/-135.465605 (09.05.2020); **California**: \*34.147385/-116.982348 (04.03.2020); 37.092214/-119.231353 (26.06.2020); \*41.652407/-123.798178 (31.05.2020); \*39.210983/-120.812912 (22.05.2020); \*36.58477/-118.705903 (24.04.2020); 37.081695/-119.315767 (24.04.2020); \*40.316553/-121.183502 (13.04.2020); 36.584642/-118.705772 (24.04.2020); 38.589516/-121.458215 (31.03.2020); 39.432115/-120.24123 (25.06.2016); 39.432137/-120.241228 (25.06.2016); \*38.734335/-122.758934 (19.03.2017); \*37.991325/-120.241352 (15.02.2020); \*37.609817/-119.024024 (09.07.2019); 36.5815/-118.751563 (20.06.2019); 38.920775/-120.657608 (29.05.2019); 36.740917/-118.974237 (25.07.2019); 39.863872/-120.16389

(12.06.2019); 38.025561/-119.971337 (03.06.2019); 37.113079/-119.293276 (06.06.2019); 37.074117/-119.344475 (11.06.2019); 39.405142/-123.790839 (07.04.2019); 37.753312/-119.837937 (20.04.2019); 36.727962/-118.979753 (21.06.2018); 36.562653/-118.785208 (05.05.2018); **Colorado:** \*39.747192/-104.947692 (20.03.2018); \*38.771382/-104.651917 (11.03.2020); 39.978358/-105.110703 (07.03.2020); 40.058697/-105.158768 (07.03.2020); 38.678499/-104.699997 (17.02.2017); 40.547255/-104.69507 (24.04.2019); \*40.088861/-102.227526 (08.04.2017); **Idaho:** \*43.93713/-115.62212 (26.05.2017); \*48.735835/-116.859828 (18.05.2019); \*42.751196/-112.393959 (29.04.2020); 42.749167/-112.393889 (29.04.2020); \*46.943462/-116.412513 (10.05.2020); **Montana:** \*46.876666/-114.013835 (27.06.2020); 46.876175/-114.013044 (22.05.2020); 46.875825/-113.974663 (11.05.2019); \*45.198259/-109.243551 (18.04.2019); \*45.404113/-111.222625 (28.05.2018); \*48.20621/-114.26109 (22.04.2017); 48.680557/-113.818359 (10.06.2016); **New Mexico:** \*34.431597/-104.211099 (25.01.2020); 34.43162/-104.21122 (28.06.2019); 34.431035/-104.219247 (14.01.2016); **Oregon:** \*44.404827/-121.730599 (25.05.2020); \*42.237489/-122.766243 (05.01.2020); \*44.048259/-123.049263 (25.05.2020); \*45.281647/-121.684988 (04.07.2020); 45.383571/-121.58475 (11.07.2020); \*45.416187/-118.125558 (29.05.2020); \*43.535707/-123.94188 (29.05.2020); 45.170386/-121.576572 (10.05.2020); \*45.200958/-123.723381 (18.04.2019); \*44.400741/-119.329268 (05.05.2019); 44.536685/-123.249831 (03.06.2018); 45.493458/-121.814172 (21.05.2018); 44.046856/-124.098068 (05.05.2018); \*43.722328/-121.192108 (03.06.2017); 44.052861/-121.26928 (17.11.2017); 42.899965/-122.095533 (22.07.2016); **Utah:** \*41.770367/-111.764917 (29.04.2020); \*40.5/-112.06 (29.04.2020); **Washington:** \*48.702413/-122.483723 (14.04.2020); \*47.478538/-121.76075 (09.04.2020); \*47.572002/-117.404108 (02.04.2020); \*46.939676/-121.685755 (06.07.2010); \*47.196195/-122.476142 (28.03.2020); 47.782625/-117.498756 (06.03.2020); 47.428328/-122.501949 (30.05.2012); 47.195357/-122.86348 (04.04.2019); \*47.592167/-123.82238 (16.06.2016); 46.752828/-121.814362 (30.06.2019); \*47.709/-121.13813 (01.07.2019); 47.072632/-121.578613 (09.06.2019); 47.961867/-123.180243 (18.05.2019); \*48.774088/-119.29715 (23.04.2019); 47.972206/-121.998391 (30.03.2019); \*46.276498/-121.59918 (18.07.2018); \*48.699398/-123.014617 (13.04.2008); \*47.210348/-120.941264 (20.06.2020); \*46.146636/-122.315628 (10.05.2020); 47.660735/-121.203572 (19.06.2020); 47.413494/-121.426142 (28.05.2020); \*47.906784/-122.297592 (11.05.2020); 48.751911/-122.478686 (15.05.2020); 47.823084/-122.369647 (05.05.2020); 47.696944/-122.050278 (05.05.2020); 48.664658/-122.332792 (29.04.2020); 48.528576/-122.201818 (16.04.2017); 46.902954/-121.63891 (04.07.2017); 46.079151/46.079151 (03.06.2017); 48.528576/-122.201818 (16.04.2017); 47.013514/-122.497857 (26.04.2020); 47.523359/-122.045724 (17.04.2020); \*47.751653/-123.078757 (15.07.2020); 47.696356/-122.211995 (12.04.2020); 47.696405/-122.211804 (12.04.2020); 47.696295/-122.211543 (12.04.2020); 47.696214/-122.211961 (11.04.2020); 47.696296/-122.211546 (12.04.2020); 46.88105/-121.590415 (31.05.2020); 48.882512/-121.534705 (21.07.2020); **Wyoming:** \*43.478907/-110.884962 (07.05.2020); 43.479096/-110.884724 (07.05.2020); \*44.956893/-106.986544 (06.04.2019); \*41.315563/-105.589312 (04.03.2018).
